# Supplementary material for: An MRI-Based Radiomic Model for Individualized Prediction of Hepatocellular Carcinoma in Patients With Hepatitis B Virus-Related Cirrhosis
Source: PubMed Central journal article supplement (PMC8964115; doi:10.3389/fonc.2022.800787), 2022-03-14
Supplement: DataSheet_1.pdf [file DataSheet_1.pdf]

## *Supplementary Material*

### **1 Supplementary material**

#### **1.1 The training, internal validation, external validation-1 or external validation-2 cohort:**

The included patients from First Affiliated Hospital of Guangxi University of Chinese Medicine were randomly divided into the training cohort and the internal validation cohort according to a 3:1 ratio. The included patients from Liuzhou People's Hospital and the Second Affiliated Hospital of Guangzhou University of Chinese Medicine were enrolled in the external validation-1 cohort, while the included patients from Shuguang Hospital of Shanghai University of Traditional Chinese Medicine and Affiliated Hospital of Guilin Medical University were enrolled in the external validation-2 cohort. The related clinical information of external validation-2 cohort was incomplete. So table 3 in manuscripts does not include external validation-2 cohort. This retrospective study was approved by the ethics committee, and the requirements for informed consent were waived.

#### **1.2 Diagnosis for cirrhosis in conventional MRI and HBV cirrhosis**

##### **1.2.1 Typical features of cirrhosis in conventional MRI**

(1) Morphologic changes: The cirrhotic liver develops characteristic morphologic alterations, such as surface nodularity, fibrous septa, widening of fissures, expansion of the gallbladder fossa, notching of the right lobe, atrophy of the right lobe, and relative enlargement of the lateral segments of the left lobe and caudate lobe. (2) Hepatic imaging features: In patients with advanced cirrhosis, fibrotic septa and bridges appear as low-signal-intensity reticulations on T1-weighted images and high-signal-intensity reticulations on T2-weighted images, and enhanced progressive to peak during the late venous and equilibrium phases of dynamic imaging after intravenous contrast material (most gadolinium-based contrast agents). The liver fibrotic septa surround regenerative nodules, which typically have intermediate to high signal intensity on unenhanced T1-weighted images and intermediate to low signal intensity on unenhanced T2-weighted images. (3) Extrahepatic imaging features: MRI can also show extrahepatic imaging features caused by portal hypertension, such as enlargement of the portal vein, splenomegaly, ascites and portosystemic collateral formation.

##### **1.2.2 Diagnosis for HBV cirrhosis**

The diagnostic criteria for HBV cirrhosis according to the guidelines of prevention and treatment for chronic hepatitis B (2019 version) should meet either 1 and 2 (pathological diagnosis) or 1 and 3 (clinical diagnosis) below: (1) Currently hepatitis B surface antigen (HBsAg) positive, or HBsAg negative, anti-HBc positive, and have a clear history of chronic HBV infection (HBsAg positive for more than 6 months in the past), and other causes are excluded. (2) Pathologically consistent with liver cirrhosis by liver biopsy. (3) Patients with 2 or more of the following 5 criteria, excluding non-cirrhotic portal hypertension: (i) imaging findings showing signs of cirrhosis and/or portal hypertension; (ii) Endoscopic examination showed varicose veins in esophagogastric fundus; (iii) The determination of liver hardness was consistent with cirrhosis; (iv) Serum biochemical examination showed decreased albumin level ( $< 35\text{g/L}$ ) and /or prolonged PT ( $>3\text{s}$ ); (v) Blood routine examination showed platelet count  $< 100 \times 10^9 /\text{L}$ , etc.

### 1.3 Supplementary formula - Rad-score calculation:

Radscore =

Pre-contrast-W7.SRE\*0.033+

Pre-contrast-W8.Co\_Var\_11\*0.059+

HAP-W6.Co\_Var\_12\*0.171+

HAP-W9.Mid\*0.003+

PVP-W4.IMC2\_10\* -0.044+

PVP-W4.Co\_Corr\_5\* -0.02+

PVP-W4.Co\_Corr\_6\*0.052+

PVP-W7.Skewness\* -0.024+

PVP-W7.Co\_Corr\_12\*0.222+

PVP-W8.IMC1\_5\*0.085+

EP-W1.SVR\*0.052+

EP-W1.Diff\_entropy\_10\*0.005+

EP-W1.Entropy\_GLCM\_10\*0.035+

EP-W6.Co\_Corr\_7\*0.044+

EP-W7.Co\_Corr\_12\*0.003+

EP-W8.Dissimilarity\_5\*0.021+

EP-W9.Mid\*0.012+

T2WI-W7.Co\_Var\_2\* -0.027

Abbreviation: SVR: surface-to-volume ratio; Co\_Corr: correlation; Co\_Var: variance; Mid: median; Skewness: Skewness; SD: spherical disproportion; IMC: information measure of correlation; Homo2:homogeneity2; MAD: mean absolute deviation

Cluster\_Shade: cluster shade; Dissimilarity: Dissimilarity; Diff\_entropy: difference entropy; Entropy: entropy; Mean: mean; SRE: short run emphasis;

W1-8: wavelet decompositions, W0 represents the originate plane and W1-8 represent 8 wavelet plane. The number written after the feature named as 1-13 represents the direction of the texture matrix. Mean indicates the average of the 13 directions.

pre-contrast: pre-contrast phase; HAP: hepatic arterial phase; PVP: portal venous phase; EP: equilibrium phase; T2WI: T2 weighted imaging.

## 2 Supplementary Figures and Tables

### 2.1 Supplementary Figures

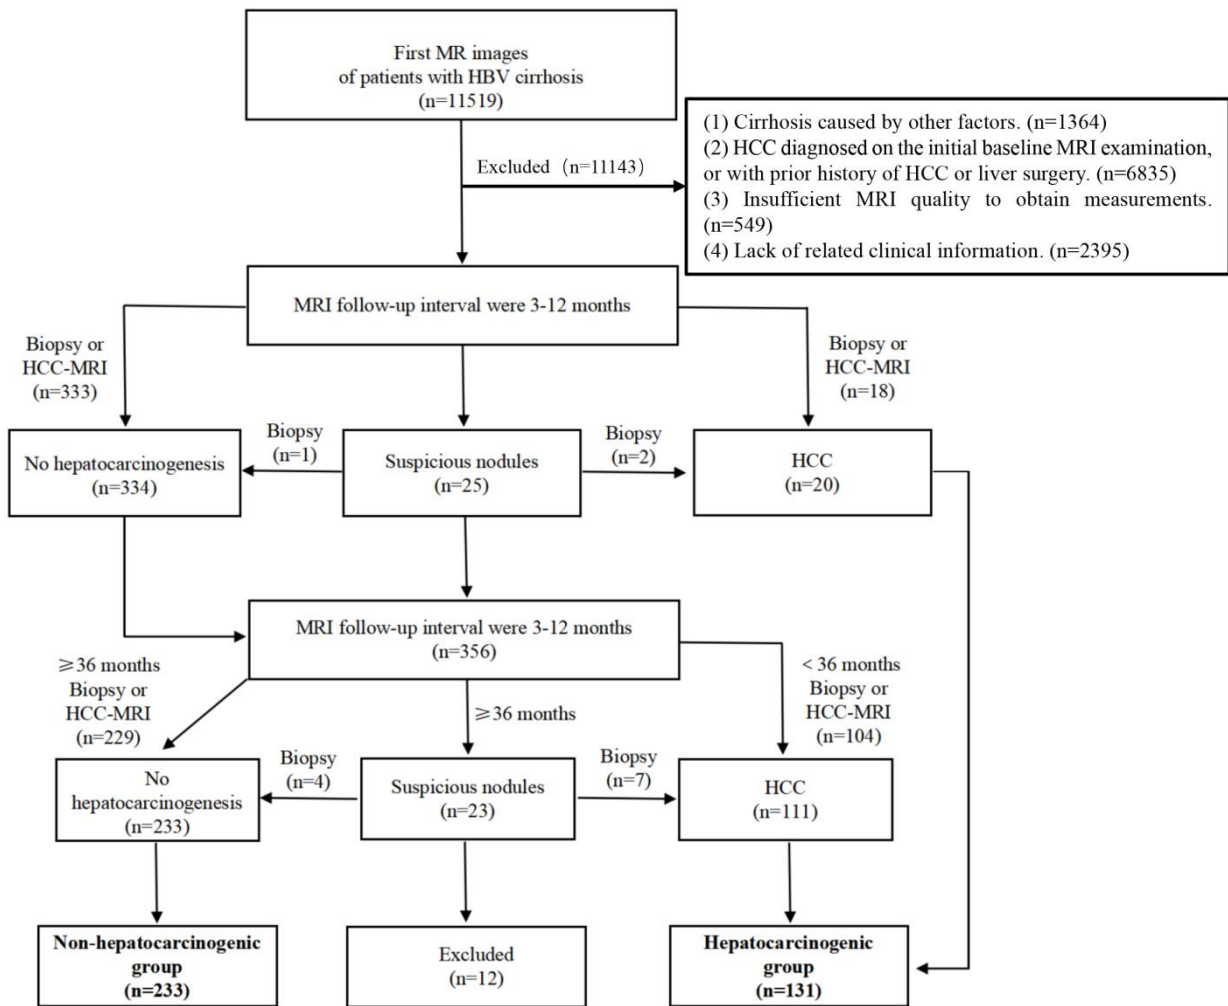

**Supplementary Figure 1.** HCC Surveillance and Diagnosis of patients with HBV cirrhosis are shown in the flow diagram above. Suspicious nodules on MRI including LI-RADS 3 and LI-RADS 4 according to the 2018 AASLD guidelines, lack of the typical features of imaging such as “washout” (nonperipheral) , enhancing pseudocapsule, and threshold growth.

## 2.2 Supplementary Tables

**Supplementary Table 1.** Scanner models, field strengths and acquisition settings for the five centres

|                                     | FAHGUCM <sup>a</sup> | SUTCM <sup>b</sup>                          | AHGM <sup>c</sup>                          | LPH <sup>d</sup>        | SAHG <sup>e</sup>                          |
|-------------------------------------|----------------------|---------------------------------------------|--------------------------------------------|-------------------------|--------------------------------------------|
| Scanners                            | Siemens Verio 3.0T   | Philips Achieva 1.5T and Siemens verio 3.0T | Siemens Avanto 1.5T and Siemens verio 3.0T | Philips Achieva 3.0T TX | Siemens Verio 3.0T and Siemens Avanto 1.5T |
| T <sub>1</sub> T <sub>E</sub> (ms)  | 1.96                 | 1.39-4.7                                    | 1.22-2.79                                  | 1.40                    | 1.39-2.39                                  |
| T <sub>1</sub> T <sub>R</sub> (ms)  | 4.4                  | 3.92-244                                    | 3.40-6.03                                  | 3.7                     | 3.92-4.9                                   |
| T <sub>1</sub> slice thickness (mm) | 3.0                  | 5-7                                         | 2-3                                        | 3.0                     | 5-6                                        |
| T <sub>1</sub> slice gap (mm)       | 0.6                  | 1                                           | 0.4-0.6                                    | 0.6                     | 1.2                                        |
| T <sub>2</sub> T <sub>E</sub> (ms)  | 80                   | 70-99                                       | 85-93                                      | 70                      | 77-90                                      |
| T <sub>2</sub> T <sub>R</sub> (ms)  | 2000                 | 358-1800                                    | 3821.14-5224.72                            | 859                     | 2200-3000                                  |
| T <sub>2</sub> slice thickness (mm) | 6                    | 5-7                                         | 2-3                                        | 7.0                     | 3.0                                        |
| T <sub>2</sub> slice gap (mm)       | 1.2                  | 1                                           | 0.4-0.6                                    | 2.0                     | 0.6                                        |
| FOV (mm)                            | 380×269 - 380×328    | 380×301- 380×309                            | 360×315- 380×297                           | 320×348- 375×306        | 256×179- 384×286                           |

<sup>a</sup>FAHGUCM: The First Affiliated Hospital of Guangxi University of Chinese Medicine

<sup>b</sup>SUTCM: Shanghai University of Traditional Chinese Medicine

<sup>c</sup>AHGM: Affiliated Hospital of Guilin Medical university

<sup>d</sup>LPH: Liuzhou People's Hospital

<sup>e</sup>SAHG: The Second Affiliated Hospital of Guangzhou university of Chinese Medicine

**Supplementary Table 2.** Results of univariate Cox proportional hazards analyses for all clinical factors.

| <b>Factors</b>   | <b>p-value</b>              |
|------------------|-----------------------------|
| <b>CTP class</b> | <b>4.93×10<sup>-5</sup></b> |
| AFP              | 0.796                       |
| Age              | 0.773                       |
| <b>Gender</b>    | <b>0.013</b>                |
| FH of HCC        | 0.608                       |
| Smoking          | 0.215                       |
| HBV-DNA level    | 0.217                       |
| Drinking Alcohol | 0.196                       |

Abbreviations: **FH of HCC: family history of HCC; CTP class: Child-Turcotte-Pugh classification.**

**Supplementary Table 3. Radiomics feature selection results based on LASSO in uni-sequence and multi-sequences MRI.**

| Modality                  | Pre-contrast         | HAP          | PVP                     | EP                  | T2WI                  | ALL                       |
|---------------------------|----------------------|--------------|-------------------------|---------------------|-----------------------|---------------------------|
| <b>Number of features</b> | 9                    | 4            | 17                      | 5                   | 5                     | 18                        |
| <b>Features list</b>      | W1.IMC2_5            | W5.HGLRE_13  | W1.IMC1_4               | W2.SRE_4            | W1.Contract_2         | Pre-contrast-W7.SRE       |
|                           | W2.LRLGLE_13         | W7.RLN_5     | W1.SRLGLE_8             | W2.SRE_5            | W5.Entropy_GLCM_3     | Pre-contrast-W8.Co_Var_11 |
|                           | W4.Max_GLCM_12       | W8.Co_Var_9  | W2.RP_1                 | W4.Max_GLCM_12      | W5.Sum_var_3          | HAP-W6.Co_Var_12          |
|                           | W4.RLN_10            | W8.Co_Var_10 | W2.LRE_4                | W4.Max_GLCM_13      | W6.IDN_2              | HAP-W9.Mid                |
|                           | W6.HGLRE_12          |              | W3.LRE_10               | W8.Sum_entropy_mean | W8.Cluster_Tendency_4 | PVP-W4.IMC2_10            |
|                           | W6.SRLGLE_2          |              | W4.Energy_GLCM_13       |                     |                       | PVP-W4.Co_Corr_5          |
|                           | W7.RP_12             |              | W4.IMC2_10              |                     |                       | PVP-W4.Co_Corr_6          |
|                           | W8.AutoCorr_4        |              | W4.IMC2_11              |                     |                       | PVP-W7.Skewness           |
|                           | W8.Diff_entropy_mean |              | W4.Cluster_Prominence_8 |                     |                       | PVP-W7.Co_Corr_12         |
|                           |                      |              | W5.Diff_entropy_8       |                     |                       | PVP-W8.IMC1_5             |
|                           |                      |              | W5.HGLRE_9              |                     |                       | EP-W1.SVR                 |
|                           |                      |              | W6.LRE_10               |                     |                       | EP-W1.Diff_entropy_10     |
|                           |                      |              | W7.Entropy_GLCM_1       |                     |                       | EP-W1.Entropy_GLCM_10     |
|                           |                      |              | W7.GLN_9                |                     |                       | EP-W6.Co_Corr_7           |
|                           |                      |              | W7.LRLGLE_1             |                     |                       | EP-W7.Co_Corr_12          |
|                           |                      |              | W8.Sum_entropy_1        |                     |                       | EP-W8.Dissimilarity_5     |
|                           |                      |              | W8.IDNM_2               |                     |                       | EP-W9.Mid                 |
|                           |                      |              |                         |                     |                       | T2WI-W7.Co_Var_2          |

Abbreviations: SVR: Surface-to-volume ratio; Co\_Corr: Correlation; Co\_Var: Variance; Mid: Median; Skewness: Skewness; SD: Spherical Disproportion; IMC: Information Measure of Correlation; Homo2: Homogeneity2; MAD: Mean Absolute Deviation; Cluster\_Shade: Cluster Shade; RP: Run Percentage; Dissimilarity: Dissimilarity; Diff\_entropy: Difference Entropy; Entropy: Entropy; Mean: Mean; GLN: Gray Level Non-Uniformity; RLN:Run Length Non-Uniformity; IDN: Inverse Difference Normalized; SRE: Short Run Emphasis; LRE: Longrun Emphasis; HGLRE: High Gray Level Run Emphasis; SRLGLE: Short Run Low Gray Level Emphasis; LRLGLE: Long Run Low Gray Level Emphasis.

pre-contrast: pre-contrast phase; HAP: hepatic arterial phase; PVP: portal venous phase; EP: equilibrium phase; T2WI: T2 weighted imaging.

W1-8: wavelet decompositions, W0 represents the originate plane and W1-8 represent 8 wavelet plane. The number written after the feature named as 1-13 represents the direction of the texture matrix. Mean indicates the average of the 13 directions.
